# Supplementary material
Source: Springer Nature journal article supplement (https://www.springermedizin.de/resource/supplementary/12884_2012_875_MOESM2_ESM.pdf/9458410)

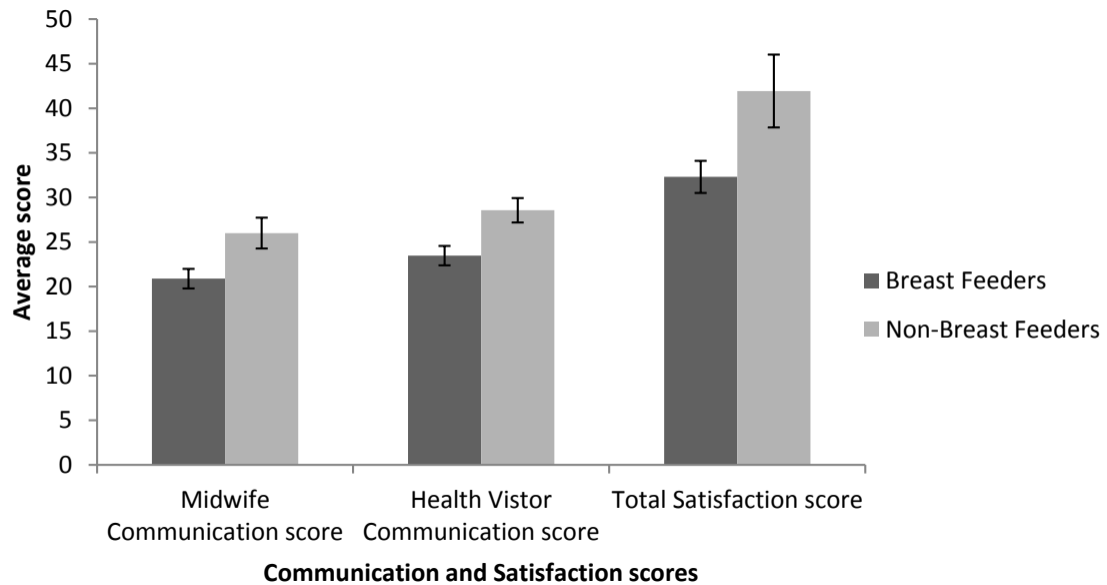

Supplement: MOESM2 [file 9458410]
